# Supplementary material for: Carbanion as a Superbase for Catalyzing Thiol–Epoxy Photopolymerization
Source: Polymers (Basel). 2017 Aug 29;9(9):400. doi: 10.3390/polym9090400 (PMC6418981; doi:10.3390/polym9090400)
Supplement: Supplementary file 1 [file polymers-09-00400-s001.pdf]

# Supplementary Materials: Carbanion as a Superbase for Catalyzing Thiol–Epoxy Photopolymerization

Xiaoqing Dong, Peng Hu, Weizhen Shen, Zhiquan Li, Ren Liu, Xiaoya Liu

## Experimental Section

### Electron Spin Resonance Spin-Trapping

The electron spin resonance (ESR) experiments were carried out using an EMXplus-10/12 X-band spectrometer (Bruker, Karlsruhe, Germany) at 100 kHz magnetic field modulation, which was used to adjust the power intensity to 20 mW. The mixture of PBGs (photobase generators, 1 mol%) and Phenyl-N-tert-butyl-nitrone (PBN, TCI Chemicals, Shanghai, China, 2 mol%) was dissolved in benzene and deoxygenated with nitrogen for 5 min before irradiation. The radicals were generated through photolysis at room temperature (LED source emitting 365 nm light, UV Pro, Shanghai, China, irradiation for 30 s).

### Laser Flash Photolysis

Laser flash photolysis (LFP) experiments employed the Edinburgh Analytical Instruments F900 (Edinburgh Instruments, Livingston, United Kingdom) which used an Nd/YAG laser (355 nm, 25 mJ per 8 ns pulse) and a multichannel scaler. PBGs samples at concentrations ranging from 0.1 to 0.3 mM were prepared in acetonitrile, which were purged with the appropriate gas (i.e., N<sub>2</sub>, Ar<sub>2</sub>) for 30 min before, and during, the acquisition of the transient spectrum.

## Figures

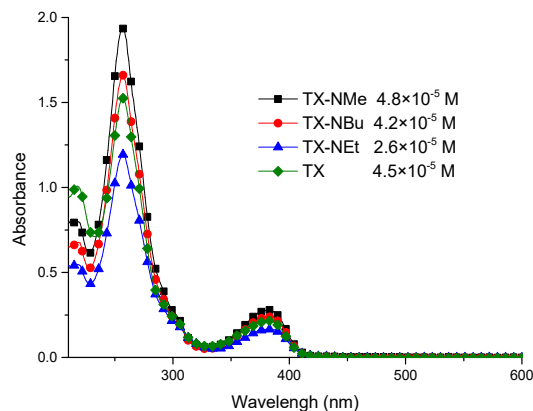

Figure S1. UV-VIS absorbance spectrum of PBGs in acetonitrile solution.

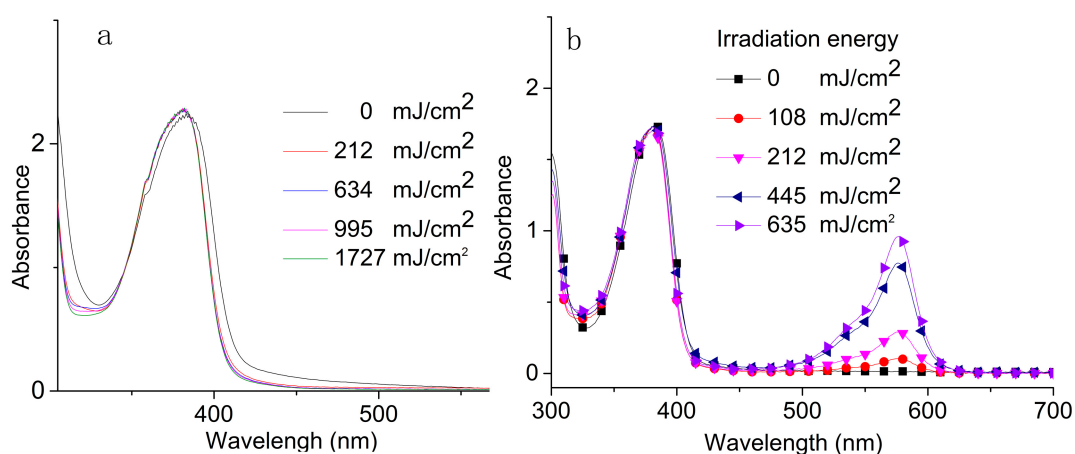

**Figure S2.** UV-VIS spectra changes of TX-NEt (9-Oxo-9H-thioxanthen-2-yl)-acetatetetraethyl-ammonium) solution (10<sup>-4</sup> M) without (a) and with (b) the addition of phenol red irradiated with an Hg lamp at different light doses.

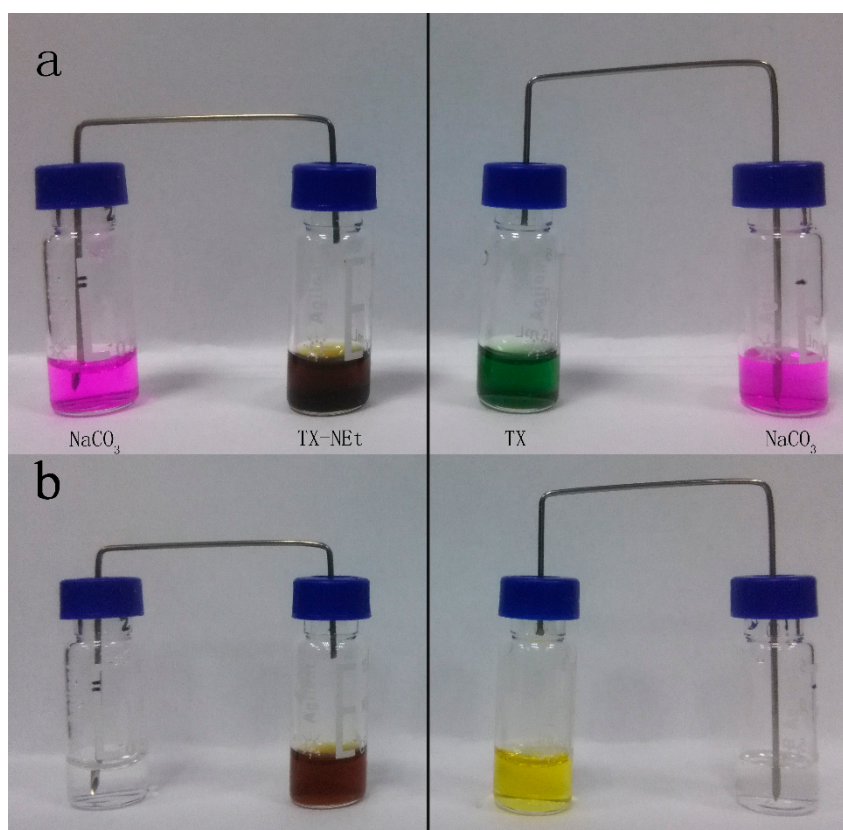

**Figure S3.** Photos of generated CO<sub>2</sub> detection: (a) before and (b) for 20 min UV irradiation solution of TX-NEt and TX (thioxanthone acetic acid, 5.0×10<sup>-3</sup> M), solutions of Na<sub>2</sub>CO<sub>3</sub> (2.0 × 10<sup>-4</sup> M) using an IWATA UV-100 LED irradiating 365 nm light.

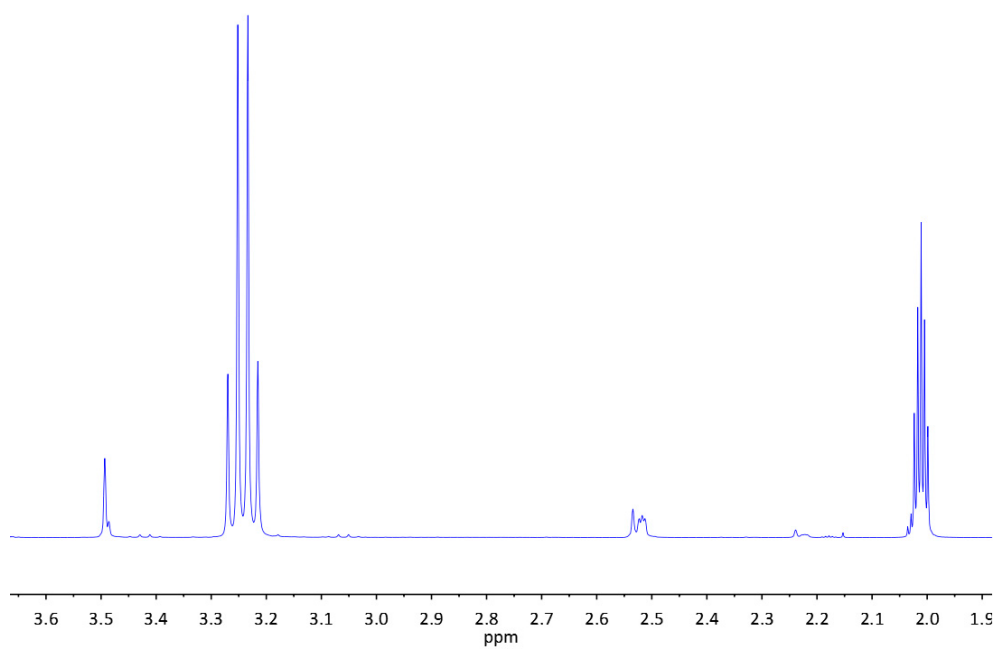

**Figure S4.**  $^1\text{H}$  NMR spectrum of TX-NET in  $\text{CDCl}_3$  with  $\text{D}_2\text{O}$  under 30 s irradiation.

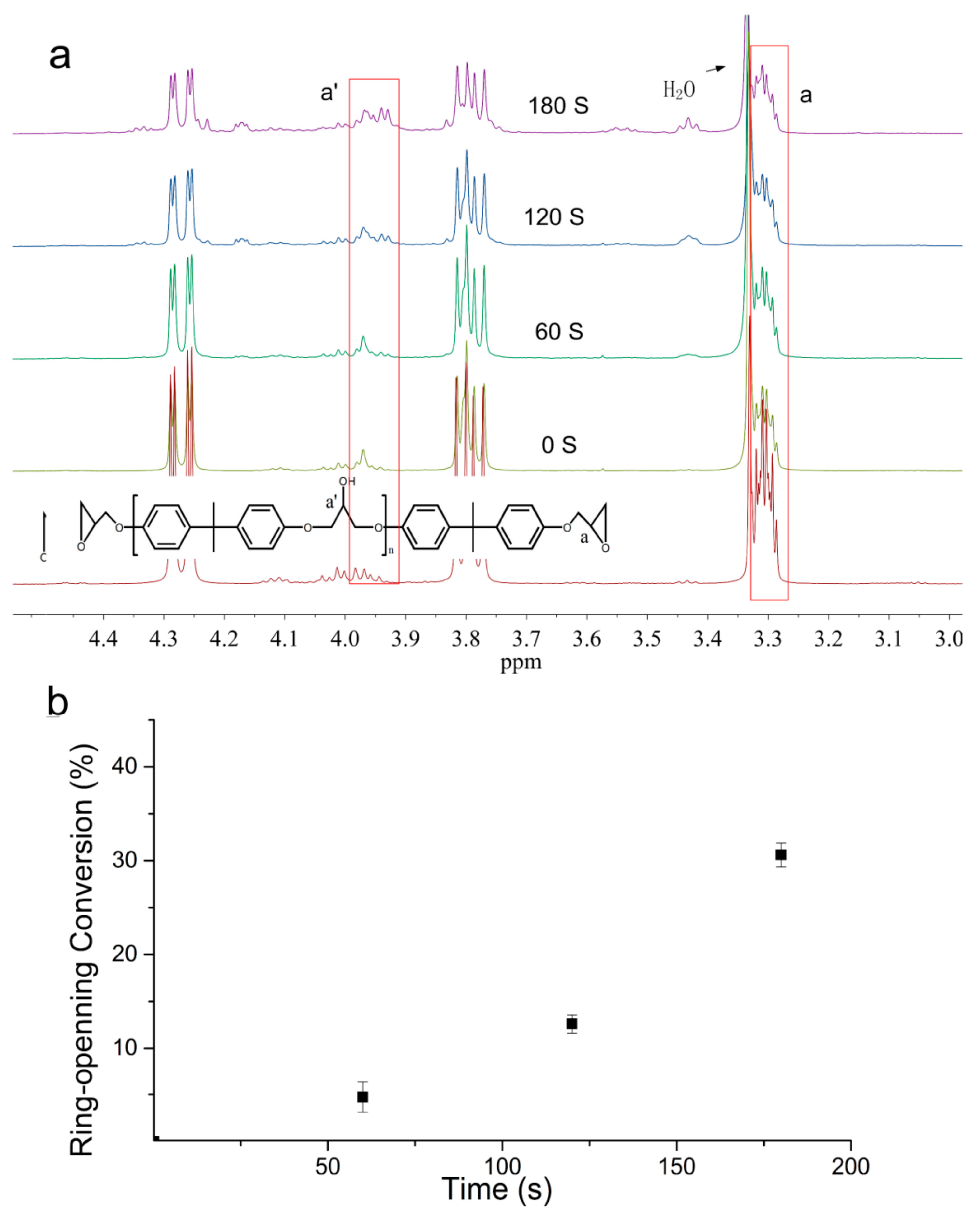

**Figure S5.** Ring-opening polymerization  $^1\text{H}$  NMR spectra (DMSO- $d_6$ ) of BADGE (a diglycidyl ether), and mixtures of TX and BADGE irradiated by an LED lamp (a); and the conversion degree of BADGE ring-opening under irradiation (b).

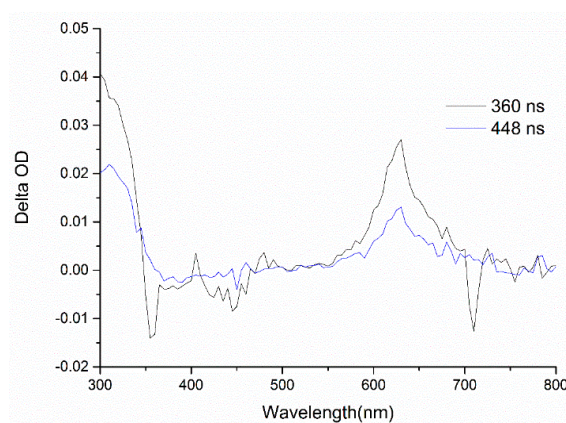

**Figure S6.** Transient optical absorption spectrum following laser excitation (355 nm) of TX-NET in nitrogen saturated acetonitrile solution at 25 °C.

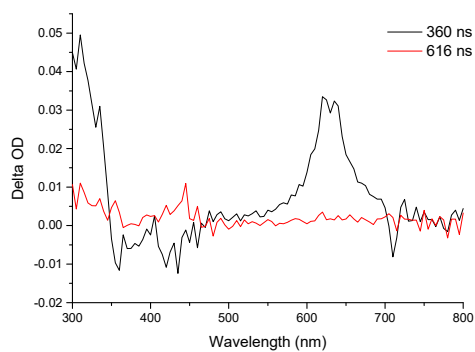

**Figure S7.** Transient optical absorption spectrum following laser excitation (355 nm) of TX in nitrogen-saturated acetonitrile solution at 25 °C.

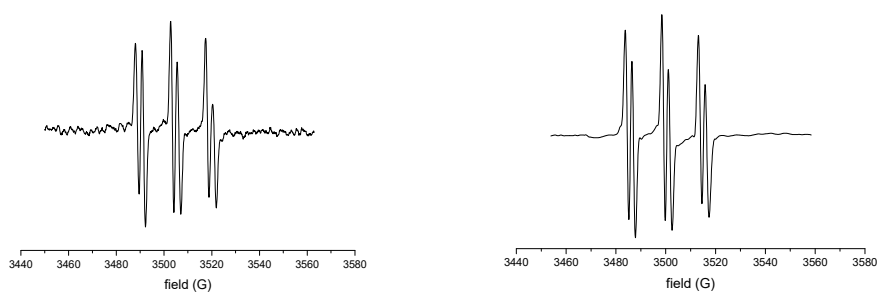

**Figure S8.** ESR spectrum of TX-NEt (**left**) and TX (**right**).

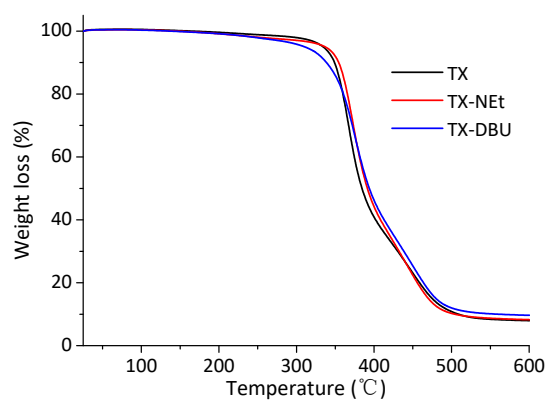

**Figure S9.** TG curves of photocured films catalyzed by different PBGs.
